# Supplementary material for: The Influence of Sex, Gender, and Age on COVID-19 Data in the Piedmont Region (Northwest Italy): The Virus Prefers Men
Source: MDPI journal article supplement (doi:10.3390/life12050643), 2022-04-26
Supplement: s1 [file s1]

# 1-COVID-19 testing

**tab1.1**

All dataset records

| Health districts     | num    | %      |
|----------------------|--------|--------|
| ASL CITTA' DI TORINO | 202811 | 80.59% |
| ASLTO4               | 20657  | 8.21%  |
| ASLTO3               | 9830   | 3.91%  |
| ASLTO5               | 5354   | 2.13%  |
| CITTA' DELLA SALUTE  | 4122   | 1.64%  |
| AO MAURIZIANO        | 3881   | 1.54%  |
| AOUSANLUIGI          | 895    | 0.36%  |
| ASLAL                | 845    | 0.34%  |
| ASLCN1               | 811    | 0.32%  |
| ASLVC                | 606    | 0.24%  |
| ASLAT                | 580    | 0.23%  |
| ASLCN2               | 513    | 0.20%  |
| ASLNOVARA            | 285    | 0.11%  |
| ASLBI                | 186    | 0.07%  |
| ASLVCO               | 113    | 0.04%  |
| AO CUNEO             | 75     | 0.03%  |
| AO ALESSANDRIA       | 69     | 0.03%  |
| AOU MAGGIORE NOVARA  | 19     | 0.01%  |
| ND                   | 4      | 0.00%  |
| CAMPIONAMENTI ESTERN | 1      | 0.00%  |
|                      | 251657 |        |

**tab1.2**

All dataset records

| Periods              | Test Outcome |          | tot. period | %tot. period |
|----------------------|--------------|----------|-------------|--------------|
|                      | NEGATIVE     | POSITIVE |             |              |
| I-FMAM               | 57953        | 13812    | 71765       | 28.52%       |
| II-JJA               | 39900        | 1322     | 41222       | 16.38%       |
| III-SO               | 61831        | 6524     | 68355       | 27.16%       |
| IV-ND                | 53733        | 16582    | 70315       | 27.94%       |
| <b>tot.</b>          | 213417       | 38240    | 251657      | 100.00%      |
| <b>%tot. Outcome</b> | 84.80%       | 15.20%   | 100.00%     |              |

**tab1.3**

All dataset records

|        | Test Outcome |          | tot period |
|--------|--------------|----------|------------|
|        | NEGATIVE     | POSITIVE |            |
| I-FMAM | 57953        | 13812    | 71765      |
|        | 80.75%       | 19.25%   | 100%       |
| II-JJA | 39900        | 1322     | 41222      |
|        | 96.79%       | 3.21%    | 100%       |
| III-SO | 61831        | 6524     | 68355      |
|        | 90.46%       | 9.54%    | 100%       |
| IV-ND  | 53733        | 16582    | 70315      |
|        | 76.42%       | 23.58%   | 100%       |

2-Unique Subjects\_1

tab2.1 Unique subjects (Sex)

| sex | #      | %       |
|-----|--------|---------|
| F   | 67568  | 54.69%  |
| M   | 55974  | 45.31%  |
| tot | 123542 | 100.00% |

tab 2.3 Unique subjects (Sex and periods)

| Period | Sex    |        | tot    | %tot    |
|--------|--------|--------|--------|---------|
|        | F      | M      |        |         |
| I-FMAM | 24007  | 15510  | 39517  | 31.99%  |
| II-JJA | 12103  | 11387  | 23490  | 19.01%  |
| III-SO | 16730  | 16110  | 32840  | 26.58%  |
| IV-ND  | 14728  | 12967  | 27695  | 22.42%  |
| tot    | 67568  | 55974  | 123542 | 100.00% |
| %tot   | 54.69% | 45.31% |        |         |

tab2.4 Unique subjects (How many periods in which the subjects were tested)

| Number of periods |        |        |       |        |
|-------------------|--------|--------|-------|--------|
|                   | 1      | 2      | 3     | 4      |
| # subjects        | 99595  | 14033  | 7413  | 2501   |
| %                 | 80.62% | 11.36% | 6.00% | 2.02%  |
|                   |        |        |       | 123542 |

tab2.5 Unique subjects (Number of time a subjects has taken the test in the year)

| # of time | all    |        |         | Male  |         |         | Female |         |         |
|-----------|--------|--------|---------|-------|---------|---------|--------|---------|---------|
|           | #      | %      | Cum%    | #     | %       | Cum%    | #      | %       | Cum%    |
| 1         | 80721  | 65.34% | 65.34%  | 38257 | 68.35%  | 68.35%  | 42464  | 62.85%  | 62.85%  |
| 2         | 18321  | 14.83% | 80.17%  | 8620  | 15.40%  | 83.75%  | 9701   | 14.36%  | 77.20%  |
| 3         | 7980   | 6.46%  | 86.63%  | 3424  | 6.12%   | 89.86%  | 4556   | 6.74%   | 83.95%  |
| 4         | 4754   | 3.85%  | 90.48%  | 1827  | 3.26%   | 93.13%  | 2927   | 4.33%   | 88.28%  |
| 5         | 3026   | 2.45%  | 92.93%  | 1077  | 1.92%   | 95.05%  | 1949   | 2.88%   | 91.16%  |
| 6         | 2371   | 1.92%  | 94.84%  | 802   | 1.43%   | 96.49%  | 1569   | 2.32%   | 93.49%  |
| 7         | 1582   | 1.28%  | 96.13%  | 486   | 0.87%   | 97.35%  | 1096   | 1.62%   | 95.11%  |
| 8         | 1175   | 0.95%  | 97.08%  | 372   | 0.66%   | 98.02%  | 803    | 1.19%   | 96.30%  |
| 9         | 908    | 0.73%  | 97.81%  | 273   | 0.49%   | 98.51%  | 635    | 0.94%   | 97.24%  |
| 10        | 683    | 0.55%  | 98.36%  | 220   | 0.39%   | 98.90%  | 463    | 0.69%   | 97.92%  |
| 11        | 594    | 0.48%  | 98.84%  | 163   | 0.29%   | 99.19%  | 431    | 0.64%   | 98.56%  |
| 12        | 422    | 0.34%  | 99.19%  | 126   | 0.23%   | 99.42%  | 296    | 0.44%   | 99.00%  |
| 13        | 339    | 0.27%  | 99.46%  | 115   | 0.21%   | 99.62%  | 224    | 0.33%   | 99.33%  |
| 14        | 207    | 0.17%  | 99.63%  | 65    | 0.12%   | 99.74%  | 142    | 0.21%   | 99.54%  |
| 15        | 168    | 0.14%  | 99.76%  | 48    | 0.09%   | 99.82%  | 120    | 0.18%   | 99.72%  |
| 16        | 110    | 0.09%  | 99.85%  | 35    | 0.06%   | 99.89%  | 75     | 0.11%   | 99.83%  |
| 17        | 70     | 0.06%  | 99.91%  | 24    | 0.04%   | 99.93%  | 46     | 0.07%   | 99.89%  |
| 18        | 54     | 0.04%  | 99.95%  | 16    | 0.03%   | 99.96%  | 38     | 0.06%   | 99.95%  |
| 19        | 32     | 0.03%  | 99.98%  | 11    | 0.02%   | 99.98%  | 21     | 0.03%   | 99.98%  |
| 20        | 9      | 0.01%  | 99.99%  | 4     | 0.01%   | 99.98%  | 5      | 0.01%   | 99.99%  |
| 21        | 2      | 0.00%  | 99.99%  | 1     | 0.00%   | 99.99%  | 1      | 0.00%   | 99.99%  |
| 22        | 7      | 0.01%  | 99.99%  | 4     | 0.01%   | 99.99%  | 3      | 0.00%   | 100.00% |
| 23        | 2      | 0.00%  | 100.00% | 0     | 0.00%   | 100.00% | 2      | 0.00%   | 100.00% |
| 24        | 0      | 0.00%  | 100.00% | 0     | 0.00%   | 100.00% | 0      | 0.00%   | 100.00% |
| 25        | 2      | 0.00%  | 100.00% | 2     | 0.00%   | 100.00% | 0      | 0.00%   | 100.00% |
| 26        | 2      | 0.00%  | 100.00% | 1     | 0.00%   | 100.00% | 1      | 0.00%   | 100.00% |
| 29        | 1      | 0.00%  | 100.00% | 1     | 0.00%   | 100.00% | 0      | 0.00%   | 100.00% |
|           | 123542 | 1      |         | 55974 | 100.00% |         | 67568  | 100.00% |         |

tab2.5 bis Statistical parameter of the distributions in tab2.5

|        | Min. | 1st Qu. | Median | Mean  | 3rd Qu. | Max. |
|--------|------|---------|--------|-------|---------|------|
| all    | 1    | 1       | 1      | 2.037 | 2       | 29   |
| male   | 1    | 1       | 1      | 1.831 | 2       | 29   |
| female | 1    | 1       | 1      | 2.208 | 2       | 26   |

### 3-Unique Subjects\_2

tab 3.1 Unique subjects (Number of negative and/or positive outcome per subject)

| #       | # positive outcome |      |      |     |     |    |    |   |   |   |    |    |    |    |
|---------|--------------------|------|------|-----|-----|----|----|---|---|---|----|----|----|----|
| negativ | 0                  | 1    | 2    | 3   | 4   | 5  | 6  | 7 | 8 | 9 | 10 | 11 | 12 | 14 |
| 0       | 0                  | 9933 | 1828 | 305 | 58  | 13 | 4  | 4 | 3 | 0 | 1  | 0  | 0  | 0  |
| 1       | 70788              | 3635 | 836  | 176 | 59  | 16 | 7  | 5 | 0 | 1 | 1  | 0  | 0  | 0  |
| 2       | 12858              | 1983 | 841  | 339 | 123 | 57 | 18 | 8 | 3 | 1 | 1  | 0  | 0  | 0  |
| 3       | 4856               | 805  | 529  | 259 | 106 | 41 | 19 | 6 | 8 | 0 | 2  | 0  | 0  | 0  |
| 4       | 2874               | 371  | 320  | 158 | 92  | 33 | 8  | 4 | 2 | 3 | 1  | 0  | 0  | 0  |
| 5       | 1715               | 299  | 175  | 107 | 56  | 14 | 12 | 6 | 3 | 0 | 1  | 1  | 0  | 0  |
| 6       | 1350               | 200  | 137  | 67  | 32  | 28 | 4  | 5 | 0 | 0 | 1  | 0  | 0  | 0  |
| 7       | 875                | 159  | 127  | 51  | 29  | 18 | 6  | 1 | 4 | 2 | 0  | 0  | 0  | 0  |
| 8       | 613                | 124  | 82   | 45  | 27  | 14 | 6  | 6 | 1 | 1 | 1  | 0  | 1  | 0  |
| 9       | 474                | 107  | 63   | 44  | 11  | 6  | 3  | 1 | 2 | 0 | 1  | 1  | 0  | 1  |
| 10      | 378                | 73   | 42   | 39  | 11  | 9  | 2  | 1 | 2 | 0 | 0  | 0  | 0  | 0  |
| 11      | 330                | 69   | 32   | 16  | 8   | 8  | 3  | 0 | 0 | 0 | 0  | 0  | 0  | 0  |
| 12      | 209                | 43   | 21   | 12  | 9   | 7  | 2  | 0 | 1 | 1 | 0  | 0  | 0  | 0  |
| 13      | 181                | 29   | 18   | 13  | 4   | 5  | 2  | 0 | 0 | 0 | 0  | 0  | 0  | 0  |
| 14      | 116                | 22   | 13   | 9   | 7   | 1  | 0  | 0 | 0 | 0 | 0  | 0  | 0  | 0  |
| 15      | 85                 | 9    | 5    | 3   | 3   | 0  | 0  | 0 | 0 | 0 | 0  | 0  | 0  | 0  |
| 16      | 50                 | 5    | 1    | 4   | 0   | 0  | 0  | 0 | 0 | 0 | 0  | 0  | 0  | 0  |
| 17      | 33                 | 6    | 5    | 0   | 0   | 0  | 0  | 0 | 0 | 0 | 0  | 0  | 0  | 0  |
| 18      | 27                 | 1    | 0    | 0   | 1   | 0  | 0  | 0 | 0 | 0 | 0  | 0  | 0  | 0  |
| 19      | 15                 | 1    | 0    | 1   | 1   | 0  | 0  | 0 | 0 | 0 | 0  | 0  | 0  | 0  |
| 20      | 5                  | 0    | 0    | 0   | 0   | 0  | 0  | 0 | 0 | 0 | 0  | 0  | 0  | 0  |
| 21      | 1                  | 1    | 0    | 0   | 0   | 0  | 0  | 0 | 0 | 0 | 0  | 0  | 0  | 0  |
| 22      | 4                  | 0    | 0    | 0   | 0   | 0  | 0  | 0 | 0 | 0 | 0  | 0  | 0  | 0  |
| 23      | 0                  | 0    | 0    | 1   | 0   | 0  | 0  | 0 | 0 | 0 | 0  | 0  | 0  | 0  |
| 24      | 0                  | 1    | 0    | 0   | 0   | 0  | 0  | 0 | 0 | 0 | 0  | 0  | 0  | 0  |
| 25      | 1                  | 0    | 0    | 0   | 0   | 0  | 0  | 0 | 0 | 0 | 0  | 0  | 0  | 0  |
| 26      | 1                  | 0    | 0    | 1   | 0   | 0  | 0  | 0 | 0 | 0 | 0  | 0  | 0  | 0  |

sum of yellow = subject with only one tests 80721

sum of sky blue = subjects with more than one positive outcome 15770

sum of green = subjects with more than one negative outcome 27051

tab3.2 Unique subjects (by periods, sex and outcome)

| I-FMAM II-JJA III-SO IV-ND |        |        |        |        |        |
|----------------------------|--------|--------|--------|--------|--------|
| F                          | 24007  | 12103  | 16730  | 14728  | 67568  |
|                            | 35.53% | 17.91% | 24.76% | 21.80% | #####  |
| M                          | 15510  | 11387  | 16110  | 12967  | 55974  |
|                            | 27.71% | 20.34% | 28.78% | 23.17% | #####  |
| tot                        | 39517  | 23490  | 32840  | 27695  | 123542 |
|                            | 31.99% | 19.01% | 26.58% | 22.42% | #####  |
| Negative                   |        |        |        |        |        |
| I-FMAM II-JJA III-SO IV-ND |        |        |        |        |        |
| F                          | 19030  | 11914  | 14146  | 8695   | 53785  |
|                            | 35.38% | 22.15% | 26.30% | 16.17% | #####  |
| M                          | 11509  | 11182  | 13660  | 7703   | 44054  |
|                            | 26.12% | 25.38% | 31.01% | 17.49% | #####  |
|                            | 30539  | 23096  | 27806  | 16398  | 97840  |
|                            | 31.21% | 23.61% | 28.42% | 16.76% | #####  |
| positive                   |        |        |        |        |        |
| I-FMAM II-JJA III-SO IV-ND |        |        |        |        |        |
| F                          | 4977   | 189    | 2584   | 6033   | 13783  |
|                            | 36.11% | 1.37%  | 18.75% | 43.77% | #####  |
| M                          | 4001   | 205    | 2450   | 5264   | 11920  |
|                            | 33.57% | 1.72%  | 20.55% | 44.16% | #####  |
|                            | 8978   | 394    | 5034   | 11297  | 25704  |
|                            | 34.93% | 1.53%  | 19.58% | 43.95% | #####  |

tab3.3 Unique subjects (Statistical parameter of age distributions by sex, periods and outcome)

| Age of ALL subjects       |        |         |         |        |         |         |        | Age of MALE |         |        |       |         |      | Age of FEMALE |         |        |       |         |      |
|---------------------------|--------|---------|---------|--------|---------|---------|--------|-------------|---------|--------|-------|---------|------|---------------|---------|--------|-------|---------|------|
| outcome                   | period | Min.    | 1st Qu. | Median | Mean    | 3rd Qu. | Max.   | Min.        | 1st Qu. | Median | Mean  | 3rd Qu. | Max. | Min.          | 1st Qu. | Median | Mean  | 3rd Qu. | Max. |
| negative                  | I-FMAM | 0       | 41      | 54     | 54.93   | 69      | 107    | 0           | 39      | 54     | 54.33 | 70      | 101  | 0             | 42      | 53     | 55.29 | 69      | 107  |
|                           | II-JJA | 0       | 31      | 49     | 49.59   | 69      | 106    | 0           | 30      | 49     | 49.14 | 69      | 106  | 0             | 31      | 48     | 50.02 | 70      | 103  |
|                           | III-SO | 0       | 21      | 40     | 40.22   | 57      | 104    | 0           | 19      | 37     | 39.07 | 57      | 102  | 0             | 23      | 40     | 41.33 | 58      | 104  |
|                           | IV-ND  | 0       | 29      | 47     | 47      | 63      | 109    | 0           | 28      | 47     | 46.11 | 62      | 99   | 0             | 30      | 48     | 47.79 | 63      | 109  |
| positive                  | I-FMAM | 0       | 48      | 64     | 63.43   | 82      | 108    | 0           | 49      | 63     | 61.78 | 78      | 108  | 0             | 48      | 65     | 64.76 | 85      | 105  |
|                           | II-JJA | 0       | 25      | 39     | 45.54   | 64      | 100    | 0           | 25      | 33     | 40.78 | 56      | 97   | 0             | 26      | 47     | 50.7  | 77      | 100  |
|                           | III-SO | 0       | 28      | 46     | 45.79   | 61      | 100    | 0           | 27      | 46     | 45.54 | 62      | 99   | 0             | 29      | 46     | 46.04 | 60      | 100  |
|                           | IV-ND  | 0       | 37      | 53     | 53.88   | 72      | 103    | 0           | 36      | 53     | 52.59 | 69      | 101  | 0             | 38      | 54     | 55    | 74      | 103  |
| Age regardless of outcome |        |         |         |        |         |         |        |             |         |        |       |         |      |               |         |        |       |         |      |
| period                    | Min.   | 1st Qu. | Median  | Mean   | 3rd Qu. | Max.    |        |             |         |        |       |         |      |               |         |        |       |         |      |
| I-FMAM                    | 0      | 43      | 55      | 56.86  | 74      | 108     | All    |             |         |        |       |         |      |               |         |        |       |         |      |
| II-JJA                    | 0      | 30      | 49      | 49.53  | 69      | 106     |        |             |         |        |       |         |      |               |         |        |       |         |      |
| III-SO                    | 0      | 22      | 40      | 41.07  | 58      | 104     |        |             |         |        |       |         |      |               |         |        |       |         |      |
| IV-ND                     | 0      | 32      | 50      | 49.81  | 66      | 109     |        |             |         |        |       |         |      |               |         |        |       |         |      |
| I-FMAM                    | 0      | 42      | 56      | 56.25  | 73      | 108     | Male   |             |         |        |       |         |      |               |         |        |       |         |      |
| II-JJA                    | 0      | 30      | 49      | 48.99  | 68      | 106     |        |             |         |        |       |         |      |               |         |        |       |         |      |
| III-SO                    | 0      | 20      | 39      | 40.05  | 58      | 102     |        |             |         |        |       |         |      |               |         |        |       |         |      |
| IV-ND                     | 0      | 31      | 49      | 48.74  | 65      | 101     |        |             |         |        |       |         |      |               |         |        |       |         |      |
| I-FMAM                    | 0      | 43      | 55      | 57.26  | 75      | 107     | Female |             |         |        |       |         |      |               |         |        |       |         |      |
| II-JJA                    | 0      | 31      | 48      | 50.03  | 71      | 103     |        |             |         |        |       |         |      |               |         |        |       |         |      |
| III-SO                    | 0      | 24      | 41      | 42.06  | 58      | 104     |        |             |         |        |       |         |      |               |         |        |       |         |      |
| IV-ND                     | 0      | 33      | 50      | 50.75  | 67      | 109     |        |             |         |        |       |         |      |               |         |        |       |         |      |

tab 3.4 Unique subjects (Age distributions by period sex and outcome)

| PERIOD: I-FMAM |          |      |       |          |      |       |             |      |       |          |      |       |          |      |       |             |       |       |          |       |       |          |       |       |             |       |       |
|----------------|----------|------|-------|----------|------|-------|-------------|------|-------|----------|------|-------|----------|------|-------|-------------|-------|-------|----------|-------|-------|----------|-------|-------|-------------|-------|-------|
| Age            | all      |      |       |          |      |       |             |      |       | Male     |      |       |          |      |       |             |       |       | Female   |       |       |          |       |       |             |       |       |
|                | Negative |      |       | Positive |      |       | all outcome |      |       | Negative |      |       | Positive |      |       | all outcome |       |       | Negative |       |       | Positive |       |       | all outcome |       |       |
|                | #        | %    | cum%  | #        | %    | cum%  | #           | %    | cum%  | #        | %    | cum%  | #        | %    | cum%  | #           | %     | cum%  | #        | %     | cum%  | #        | %     | cum%  | #           | %     | cum%  |
| (0,5]          | 266      | 0.9  | 0.9   | 27       | 0.3  | 0.3   | 293         | 0.7  | 0.7   | 136      | 1.2  | 1.2   | 14       | 0.5  | 0.5   | 150         | 1.0   | 1.0   | 130      | 0.7   | 0.7   | 13       | 0.3   | 0.3   | 143         | 0.6   | 0.6   |
| (5,10]         | 163      | 0.5  | 1.4   | 26       | 0.3  | 0.6   | 189         | 0.5  | 1.2   | 80       | 0.7  | 1.9   | 15       | 0.5  | 0.9   | 95          | 0.6   | 1.6   | 83       | 0.4   | 1.1   | 11       | 0.2   | 0.5   | 94          | 0.4   | 1.0   |
| (10,13]        | 112      | 0.4  | 1.8   | 19       | 0.2  | 0.8   | 131         | 0.3  | 1.6   | 66       | 0.6  | 2.5   | 6        | 0.2  | 1.1   | 72          | 0.5   | 2.0   | 46       | 0.2   | 1.4   | 13       | 0.3   | 0.7   | 59          | 0.2   | 1.2   |
| (13,18]        | 231      | 0.8  | 2.5   | 60       | 0.7  | 1.5   | 291         | 0.7  | 2.3   | 109      | 0.9  | 3.4   | 28       | 0.9  | 2.0   | 137         | 0.9   | 2.9   | 122      | 0.6   | 2.0   | 32       | 0.6   | 1.4   | 154         | 0.6   | 1.9   |
| (18,25]        | 1119     | 3.7  | 6.2   | 231      | 2.6  | 4.0   | 1350        | 3.4  | 5.7   | 501      | 4.4  | 7.8   | 108      | 3.5  | 5.5   | 609         | 3.9   | 6.9   | 618      | 3.2   | 5.2   | 123      | 2.5   | 3.9   | 741         | 3.1   | 5.0   |
| (25,35]        | 3568     | 11.7 | 17.9  | 664      | 7.4  | 11.4  | 4232        | 10.7 | 16.4  | 1390     | 12.1 | 19.8  | 302      | 9.8  | 15.3  | 1692        | 10.9  | 17.8  | 2178     | 11.4  | 16.7  | 362      | 7.3   | 11.1  | 2540        | 10.6  | 15.5  |
| (35,45]        | 4492     | 14.7 | 32.6  | 822      | 9.2  | 20.6  | 5314        | 13.4 | 29.9  | 1597     | 13.9 | 33.7  | 355      | 11.5 | 26.7  | 1952        | 12.6  | 30.3  | 2895     | 15.2  | 31.9  | 467      | 9.4   | 20.5  | 3362        | 14.0  | 29.5  |
| (45,55]        | 6634     | 21.7 | 54.3  | 1509     | 16.8 | 37.4  | 8143        | 20.6 | 50.5  | 2116     | 18.4 | 52.1  | 651      | 21.0 | 47.8  | 2767        | 17.8  | 48.2  | 4518     | 23.7  | 55.6  | 858      | 17.2  | 37.8  | 5376        | 22.4  | 51.9  |
| (55,65]        | 5281     | 17.3 | 71.6  | 1313     | 14.6 | 52.0  | 6594        | 16.7 | 67.2  | 2008     | 17.4 | 69.5  | 666      | 21.5 | 69.3  | 2674        | 17.2  | 65.4  | 3273     | 17.2  | 72.8  | 647      | 13.0  | 50.8  | 3920        | 16.3  | 68.3  |
| (65,75]        | 2615     | 8.6  | 80.2  | 1080     | 12.0 | 64.1  | 3695        | 9.4  | 76.5  | 1368     | 11.9 | 81.4  | 654      | 21.1 | 90.4  | 2022        | 13.0  | 78.5  | 1247     | 6.6   | 79.4  | 426      | 8.6   | 59.3  | 1673        | 7.0   | 75.2  |
| (75,85]        | 3191     | 10.4 | 90.6  | 1622     | 18.1 | 82.1  | 4813        | 12.2 | 88.7  | 1370     | 11.9 | 93.3  | 788      | 25.4 | 115.8 | 2158        | 13.9  | 92.4  | 1821     | 9.6   | 89.0  | 834      | 16.8  | 76.1  | 2655        | 11.1  | 86.3  |
| (85,95]        | 2565     | 8.4  | 99.0  | 1433     | 16.0 | 98.1  | 3998        | 10.1 | 98.8  | 714      | 6.2  | 99.5  | 391      | 12.6 | 128.4 | 1105        | 7.1   | 99.5  | 1851     | 9.7   | 98.7  | 1042     | 20.9  | 97.0  | 2893        | 12.1  | 98.3  |
| (95,110]       | 302      | 1.0  | 100.0 | 172      | 1.9  | 100.0 | 474         | 1.2  | 100.0 | 54       | 0.5  | 100.0 | 23       | 0.7  | 129.2 | 77          | 0.5   | 100.0 | 248      | 1.3   | 100.0 | 149      | 3.0   | 100.0 | 397         | 1.7   | 100.0 |
| tot            | 30539    | 100  |       | 8978     | 100  |       | 39517       | 100  |       | 11509    | 100  |       | 3097     | 129  |       | 15510       | 100.0 |       | 19030    | 100.0 |       | 4977     | 100.0 |       | 24007       | 100.0 |       |
| %              | 77.28%   |      |       | 22.72%   |      |       | #####       |      |       | 74.20%   |      |       | 19.97%   |      |       | 100.00%     |       |       | 79.27%   |       |       | 20.73%   |       |       | 100.00%     |       |       |

| PERIOD: II-JJA |          |      |       |          |      |       |             |      |       |          |      |       |          |      |       |             |       |       |          |       |       |          |       |       |             |       |       |
|----------------|----------|------|-------|----------|------|-------|-------------|------|-------|----------|------|-------|----------|------|-------|-------------|-------|-------|----------|-------|-------|----------|-------|-------|-------------|-------|-------|
| Age            | all      |      |       |          |      |       |             |      |       | Male     |      |       |          |      |       |             |       |       | Female   |       |       |          |       |       |             |       |       |
|                | Negative |      |       | Positive |      |       | all outcome |      |       | Negative |      |       | Positive |      |       | all outcome |       |       | Negative |       |       | Positive |       |       | all outcome |       |       |
|                | #        | %    | cum%  | #        | %    | cum%  | #           | %    | cum%  | #        | %    | cum%  | #        | %    | cum%  | #           | %     | cum%  | #        | %     | cum%  | #        | %     | cum%  | #           | %     | cum%  |
| (0,5]          | 539      | 2.3  | 2.3   | 10       | 2.5  | 2.5   | 549         | 2.3  | 2.3   | 270      | 2.4  | 2.4   | 5        | 2.4  | 2.4   | 275         | 2.4   | 2.4   | 269      | 2.3   | 2.3   | 5        | 2.6   | 2.6   | 274         | 2.3   | 2.3   |
| (5,10]         | 459      | 2.0  | 4.3   | 5        | 1.3  | 3.8   | 464         | 2.0  | 4.3   | 241      | 2.2  | 4.6   | 2        | 1.0  | 3.4   | 243         | 2.1   | 4.5   | 218      | 1.8   | 4.1   | 3        | 1.6   | 4.2   | 221         | 1.8   | 4.1   |
| (10,13]        | 328      | 1.4  | 5.7   | 2        | 0.5  | 4.3   | 330         | 1.4  | 5.7   | 173      | 1.5  | 6.1   | 0        | 0.0  | 3.4   | 173         | 1.5   | 6.1   | 155      | 1.3   | 5.4   | 2        | 1.1   | 5.3   | 157         | 1.3   | 5.4   |
| (13,18]        | 709      | 3.1  | 8.8   | 13       | 3.3  | 7.6   | 722         | 3.1  | 8.8   | 395      | 3.5  | 9.6   | 3        | 1.5  | 4.9   | 398         | 3.5   | 9.6   | 314      | 2.6   | 8.0   | 10       | 5.3   | 10.6  | 324         | 2.7   | 8.1   |
| (18,25]        | 1895     | 8.2  | 17.0  | 73       | 18.5 | 26.1  | 1968        | 8.4  | 17.2  | 925      | 8.3  | 17.9  | 48       | 23.4 | 28.3  | 973         | 8.5   | 18.1  | 970      | 8.1   | 16.2  | 25       | 13.2  | 23.8  | 995         | 8.2   | 16.3  |
| (25,35]        | 3482     | 15.1 | 32.1  | 80       | 20.3 | 46.4  | 3562        | 15.2 | 32.3  | 1606     | 14.4 | 32.3  | 56       | 27.3 | 55.6  | 1662        | 14.6  | 32.7  | 1876     | 15.7  | 31.9  | 24       | 12.7  | 36.5  | 1900        | 15.7  | 32.0  |
| (35,45]        | 3008     | 13.0 | 45.1  | 36       | 9.1  | 55.6  | 3044        | 13.0 | 45.3  | 1394     | 12.5 | 44.8  | 16       | 7.8  | 63.4  | 1410        | 12.4  | 45.1  | 1614     | 13.5  | 45.5  | 20       | 10.6  | 47.1  | 1634        | 13.5  | 45.5  |
| (45,55]        | 3355     | 14.5 | 59.6  | 44       | 11.2 | 66.8  | 3399        | 14.5 | 59.8  | 1629     | 14.6 | 59.3  | 22       | 10.7 | 74.1  | 1651        | 14.5  | 59.6  | 1726     | 14.5  | 59.9  | 22       | 11.6  | 58.7  | 1748        | 14.4  | 59.9  |
| (55,65]        | 2707     | 11.7 | 71.4  | 38       | 9.6  | 76.4  | 2745        | 11.7 | 71.4  | 1405     | 12.6 | 71.9  | 21       | 10.2 | 84.4  | 1426        | 12.5  | 72.1  | 1302     | 10.9  | 70.9  | 17       | 9.0   | 67.7  | 1319        | 10.9  | 70.8  |
| (65,75]        | 2341     | 10.1 | 81.5  | 19       | 4.8  | 81.2  | 2360        | 10.0 | 81.5  | 1256     | 11.2 | 83.1  | 8        | 3.9  | 88.3  | 1264        | 11.1  | 83.2  | 1085     | 9.1   | 80.0  | 11       | 5.8   | 73.5  | 1096        | 9.1   | 79.9  |
| (75,85]        | 2792     | 12.1 | 93.6  | 42       | 10.7 | 91.9  | 2834        | 12.1 | 93.6  | 1349     | 12.1 | 95.2  | 19       | 9.3  | 97.6  | 1368        | 12.0  | 95.2  | 1443     | 12.1  | 92.1  | 23       | 12.2  | 85.7  | 1466        | 12.1  | 92.0  |
| (85,95]        | 1387     | 6.0  | 99.6  | 24       | 6.1  | 98.0  | 1411        | 6.0  | 99.6  | 515      | 4.6  | 99.8  | 4        | 2.0  | 99.5  | 519         | 4.6   | 99.8  | 872      | 7.3   | 99.4  | 20       | 10.6  | 96.3  | 892         | 7.4   | 99.4  |
| (95,110]       | 94       | 0.4  | 100.0 | 8        | 2.0  | 100.0 | 102         | 0.4  | 100.0 | 24       | 0.2  | 100.0 | 1        | 0.5  | 100.0 | 25          | 0.2   | 100.0 | 70       | 0.6   | 100.0 | 7        | 3.7   | 100.0 | 77          | 0.6   | 100.0 |
| tot            | 23096    | 100  |       | 394      | 100  |       | 23490       | 100  |       | 11182    | 100  |       | 205      | 100  |       | 11387       | 100.0 |       | 11914    | 100.0 |       | 189      | 100.0 |       | 12103       | 100.0 |       |
| %              | 98.32%   |      |       | 1.68%    |      |       | #####       |      |       | 98.20%   |      |       | 1.80%    |      |       | 100.00%     |       |       | 98.44%   |       |       | 1.56%    |       |       | 100.00%     |       |       |



PERIOD: III-SO

| Age      | tutti    |      |       |          |      |       |             |      |       | Male     |      |       |          |      |       |             |       |       | Female   |       |       |          |       |       |             |       |       |
|----------|----------|------|-------|----------|------|-------|-------------|------|-------|----------|------|-------|----------|------|-------|-------------|-------|-------|----------|-------|-------|----------|-------|-------|-------------|-------|-------|
|          | Negative |      |       | Positive |      |       | all outcome |      |       | Negative |      |       | Positive |      |       | all outcome |       |       | Negative |       |       | Positive |       |       | all outcome |       |       |
|          | #        | %    | cum%  | #        | %    | cum%  | #           | %    | cum%  | #        | %    | cum%  | #        | %    | cum%  | #           | %     | cum%  | #        | %     | cum%  | #        | %     | cum%  | #           | %     | cum%  |
| (0,5]    | 1476     | 5.3  | 5.3   | 98       | 1.9  | 1.9   | 1574        | 4.8  | 4.8   | 813      | 6.0  | 6.0   | 48       | 2.0  | 2.0   | 861         | 5.3   | 5.3   | 663      | 4.7   | 4.7   | 50       | 1.9   | 1.9   | 713         | 4.3   | 4.3   |
| (5,10]   | 1563     | 5.6  | 10.9  | 123      | 2.4  | 4.4   | 1686        | 5.1  | 9.9   | 800      | 5.9  | 11.8  | 59       | 2.4  | 4.4   | 859         | 5.3   | 10.7  | 763      | 5.4   | 10.1  | 64       | 2.5   | 4.4   | 827         | 4.9   | 9.2   |
| (10,13]  | 1213     | 4.4  | 15.3  | 151      | 3.0  | 7.4   | 1364        | 4.2  | 14.1  | 677      | 5.0  | 16.8  | 81       | 3.3  | 7.7   | 758         | 4.7   | 15.4  | 536      | 3.8   | 13.9  | 70       | 2.7   | 7.1   | 606         | 3.6   | 12.8  |
| (13,18]  | 1963     | 7.1  | 22.4  | 280      | 5.6  | 13.0  | 2243        | 6.8  | 20.9  | 1110     | 8.1  | 24.9  | 172      | 7.0  | 14.7  | 1282        | 8.0   | 23.3  | 853      | 6.0   | 19.9  | 108      | 4.2   | 11.3  | 961         | 5.7   | 18.6  |
| (18,25]  | 2491     | 9.0  | 31.3  | 412      | 8.2  | 21.1  | 2903        | 8.8  | 29.8  | 1246     | 9.1  | 34.0  | 193      | 7.9  | 22.6  | 1439        | 8.9   | 32.3  | 1245     | 8.8   | 28.7  | 219      | 8.5   | 19.8  | 1464        | 8.8   | 27.3  |
| (25,35]  | 4127     | 14.8 | 46.2  | 722      | 14.3 | 35.5  | 4849        | 14.8 | 44.5  | 1951     | 14.3 | 48.3  | 347      | 14.2 | 36.7  | 2298        | 14.3  | 46.5  | 2176     | 15.4  | 44.1  | 375      | 14.5  | 34.3  | 2551        | 15.2  | 42.6  |
| (35,45]  | 3525     | 12.7 | 58.8  | 684      | 13.6 | 49.1  | 4209        | 12.8 | 57.3  | 1663     | 12.2 | 60.5  | 291      | 11.9 | 48.6  | 1954        | 12.1  | 58.7  | 1862     | 13.2  | 57.2  | 393      | 15.2  | 49.5  | 2255        | 13.5  | 56.0  |
| (45,55]  | 3876     | 13.9 | 72.8  | 917      | 18.2 | 67.3  | 4793        | 14.6 | 71.9  | 1775     | 13.0 | 73.5  | 437      | 17.8 | 66.4  | 2212        | 13.7  | 72.4  | 2101     | 14.9  | 72.1  | 480      | 18.6  | 68.1  | 2581        | 15.4  | 71.5  |
| (55,65]  | 2991     | 10.8 | 83.5  | 625      | 12.4 | 79.7  | 3616        | 11.0 | 82.9  | 1436     | 10.5 | 84.0  | 298      | 12.2 | 78.6  | 1734        | 10.8  | 83.2  | 1555     | 11.0  | 83.1  | 327      | 12.7  | 80.7  | 1882        | 11.2  | 82.7  |
| (65,75]  | 1976     | 7.1  | 90.6  | 428      | 8.5  | 88.2  | 2404        | 7.3  | 90.3  | 1044     | 7.6  | 91.6  | 247      | 10.1 | 88.7  | 1291        | 8.0   | 91.2  | 932      | 6.6   | 89.7  | 181      | 7.0   | 87.7  | 1113        | 6.7   | 89.4  |
| (75,85]  | 1797     | 6.5  | 97.1  | 355      | 7.1  | 95.3  | 2152        | 6.6  | 96.8  | 821      | 6.0  | 97.6  | 180      | 7.3  | 96.0  | 1001        | 6.2   | 97.4  | 976      | 6.9   | 96.6  | 175      | 6.8   | 94.5  | 1151        | 6.9   | 96.3  |
| (85,95]  | 754      | 2.7  | 99.8  | 221      | 4.4  | 99.6  | 975         | 3.0  | 99.8  | 306      | 2.2  | 99.9  | 94       | 3.8  | 99.9  | 400         | 2.5   | 99.9  | 448      | 3.2   | 99.7  | 127      | 4.9   | 99.4  | 575         | 3.4   | 99.7  |
| (95,110] | 54       | 0.2  | 100.0 | 18       | 0.4  | 100.0 | 72          | 0.2  | 100.0 | 18       | 0.1  | 100.0 | 3        | 0.1  | 100.0 | 21          | 0.1   | 100.0 | 36       | 0.3   | 100.0 | 15       | 0.6   | 100.0 | 51          | 0.3   | 100.0 |
|          | 27806    | 100  |       | 5034     | 100  |       | 32840       | 100  |       | 13660    | 100  |       | 2450     | 100  |       | 16110       | 100.0 |       | 14146    | 100.0 |       | 2584     | 100.0 |       | 16730       | 100.0 |       |
| %        | 84.67%   |      |       | 15.33%   |      |       | #####       |      |       | 84.79%   |      |       | 15.21%   |      |       | 100.00%     |       |       | 84.55%   |       |       | 15.45%   |       |       | 100.00%     |       |       |

PERIOD: IV-ND

| Age      | all      |      |       |          |      |       |             |      |       | Male     |      |       |          |      |       |             |       |       | Female   |       |       |          |       |       |             |       |       |
|----------|----------|------|-------|----------|------|-------|-------------|------|-------|----------|------|-------|----------|------|-------|-------------|-------|-------|----------|-------|-------|----------|-------|-------|-------------|-------|-------|
|          | Negative |      |       | Positive |      |       | all outcome |      |       | Negative |      |       | Positive |      |       | all outcome |       |       | Negative |       |       | Positive |       |       | all outcome |       |       |
|          | #        | %    | cum%  | #        | %    | cum%  | #           | %    | cum%  | #        | %    | cum%  | #        | %    | cum%  | #           | %     | cum%  | #        | %     | cum%  | #        | %     | cum%  | #           | %     | cum%  |
| (0,5]    | 311      | 1.9  | 1.9   | 64       | 0.6  | 0.6   | 375         | 1.4  | 1.4   | 168      | 2.2  | 2.2   | 31       | 0.6  | 0.6   | 199         | 1.5   | 1.5   | 143      | 1.6   | 1.6   | 33       | 0.5   | 0.5   | 176         | 1.2   | 1.2   |
| (5,10]   | 337      | 2.1  | 4.0   | 81       | 0.7  | 1.3   | 418         | 1.5  | 2.9   | 187      | 2.4  | 4.6   | 45       | 0.9  | 1.4   | 232         | 1.8   | 3.3   | 150      | 1.7   | 3.4   | 36       | 0.6   | 1.1   | 186         | 1.3   | 2.5   |
| (10,13]  | 253      | 1.5  | 5.5   | 104      | 0.9  | 2.2   | 357         | 1.3  | 4.2   | 142      | 1.8  | 6.5   | 51       | 1.0  | 2.4   | 193         | 1.5   | 4.8   | 111      | 1.3   | 4.6   | 53       | 0.9   | 2.0   | 164         | 1.1   | 3.6   |
| (13,18]  | 717      | 4.4  | 9.9   | 262      | 2.3  | 4.5   | 979         | 3.5  | 7.7   | 393      | 5.1  | 11.6  | 134      | 2.5  | 5.0   | 527         | 4.1   | 8.9   | 324      | 3.7   | 8.4   | 128      | 2.1   | 4.1   | 452         | 3.1   | 6.6   |
| (18,25]  | 1527     | 9.3  | 19.2  | 738      | 6.5  | 11.1  | 2265        | 8.2  | 15.9  | 718      | 9.3  | 20.9  | 356      | 6.8  | 11.7  | 1074        | 8.3   | 17.2  | 809      | 9.3   | 17.7  | 382      | 6.3   | 10.5  | 1191        | 8.1   | 14.7  |
| (25,35]  | 2447     | 14.9 | 34.1  | 1365     | 12.1 | 23.1  | 3812        | 13.8 | 29.6  | 1124     | 14.6 | 35.5  | 661      | 12.6 | 24.3  | 1785        | 13.8  | 30.9  | 1323     | 15.2  | 32.9  | 704      | 11.7  | 22.1  | 2027        | 13.8  | 28.5  |
| (35,45]  | 2161     | 13.2 | 47.3  | 1470     | 13.0 | 36.2  | 3631        | 13.1 | 42.7  | 977      | 12.7 | 48.2  | 686      | 13.0 | 37.3  | 1663        | 12.8  | 43.7  | 1184     | 13.6  | 46.5  | 784      | 13.0  | 35.1  | 1968        | 13.4  | 41.9  |
| (45,55]  | 2760     | 16.8 | 64.1  | 2018     | 17.9 | 54.0  | 4778        | 17.3 | 60.0  | 1267     | 16.4 | 64.6  | 905      | 17.2 | 54.5  | 2172        | 16.8  | 60.5  | 1493     | 17.2  | 63.7  | 1113     | 18.4  | 53.6  | 2606        | 17.7  | 59.5  |
| (55,65]  | 2345     | 14.3 | 78.4  | 1656     | 14.7 | 68.7  | 4001        | 14.4 | 74.4  | 1107     | 14.4 | 79.0  | 829      | 15.7 | 70.3  | 1936        | 14.9  | 75.4  | 1238     | 14.2  | 77.9  | 827      | 13.7  | 67.3  | 2065        | 14.0  | 73.6  |
| (65,75]  | 1552     | 9.5  | 87.9  | 1190     | 10.5 | 79.2  | 2742        | 9.9  | 84.3  | 786      | 10.2 | 89.2  | 641      | 12.2 | 82.4  | 1427        | 11.0  | 86.4  | 766      | 8.8   | 86.7  | 549      | 9.1   | 76.4  | 1315        | 8.9   | 82.5  |
| (75,85]  | 1311     | 8.0  | 95.9  | 1359     | 12.0 | 91.2  | 2670        | 9.6  | 94.0  | 599      | 7.8  | 96.9  | 639      | 12.1 | 94.6  | 1238        | 9.5   | 96.0  | 712      | 8.2   | 94.9  | 720      | 11.9  | 88.3  | 1432        | 9.7   | 92.2  |
| (85,95]  | 619      | 3.8  | 99.6  | 906      | 8.0  | 99.3  | 1525        | 5.5  | 99.5  | 221      | 2.9  | 99.8  | 273      | 5.2  | 99.8  | 494         | 3.8   | 99.8  | 398      | 4.6   | 99.5  | 633      | 10.5  | 98.8  | 1031        | 7.0   | 99.2  |
| (95,110] | 58       | 0.4  | 100.0 | 84       | 0.7  | 100.0 | 142         | 0.5  | 100.0 | 14       | 0.2  | 100.0 | 13       | 0.2  | 100.0 | 27          | 0.2   | 100.0 | 44       | 0.5   | 100.0 | 71       | 1.2   | 100.0 | 115         | 0.8   | 100.0 |
| tot      | 16398    | 100  |       | 11297    | 100  |       | 27695       | 100  |       | 7703     | 100  |       | 5264     | 100  |       | 12967       | 100.0 |       | 8695     | 100.0 |       | 6033     | 100.0 |       | 14728       | 100.0 |       |
| %        | 59.21%   |      |       | 40.79%   |      |       | #####       |      |       | 59.40%   |      |       | 40.60%   |      |       | 100.00%     |       |       | 59.04%   |       |       | 40.96%   |       |       | 100.00%     |       |       |

## 4-Health. Work.-S symth. cat

**unigrams for healthcare workers:** oper,  
operator, operator, operatore, operatric,  
operator, sanit, sanita, sanitariao,  
senitario, oss, infermier,

**tab4.1 Healthcare workers and test outcome**

| Outcome  | Others | Healt. Work. | tot     | %      | % Other | % Healt. Work. |
|----------|--------|--------------|---------|--------|---------|----------------|
| NEGATIVE | 127723 | 40276        | 167999  | 85.29% | 82.96%  | 93.62%         |
| POSITIVE | 26227  | 2744         | 28971   | 14.71% | 17.04%  | 6.38%          |
| tot      | 153950 | 43020        | 196970  |        | 100.00% | 100.00%        |
|          | 78.16% | 21.84%       | 100.00% |        |         |                |

**tab4.2 Healthcare workers and periods**

| Period     | Others | Healt. Work. | tot    | % Healt. Work. in period |
|------------|--------|--------------|--------|--------------------------|
| I-FMAM     | 48170  | 22216        | 70386  | 31.56%                   |
| II-JJA     | 34019  | 4568         | 38587  | 11.84%                   |
| III-SO     | 44735  | 13744        | 58479  | 23.50%                   |
| IV-ND      | 27026  | 2492         | 29518  | 8.44%                    |
| tot esito  | 153950 | 43020        | 196970 |                          |
| %tot esito | 78.16% | 21.84%       |        |                          |

**tab4.3 Healthcare workers and test outcome by period**

|        |             | NEGATIVE | POSITIVE |         |
|--------|-------------|----------|----------|---------|
| I-FMAM | Healt. Work | 20277    | 1939     | 22216   |
|        |             | 91.27%   | 8.73%    | 100%    |
|        | Others      | 36781    | 11389    | 48170   |
|        |             | 76.36%   | 23.64%   | 100%    |
| II-JJA | Healt. Work | 4513     | 55       | 4568    |
|        |             | 98.80%   | 1.20%    | 100%    |
|        | Others      | 32784    | 1235     | 34019   |
|        |             | 96.37%   | 3.63%    | 100%    |
| III-SO | Healt. Work | 13326    | 418      | 13744   |
|        |             | 96.96%   | 3.04%    | 100.00% |
|        | Others      | 39833    | 4902     | 44735   |
|        |             | 89.04%   | 10.96%   | 100.00% |
| IV-ND  | Healt. Work | 2160     | 332      | 2492    |
|        |             | 86.68%   | 13.32%   | 100%    |
|        | Others      | 18325    | 8701     | 27026   |
|        |             | 67.81%   | 32.19%   | 100%    |

**tab4.4 Healthcare workers- and COVID-19 related symptoms**

|              | Others | Healt. Work. | tot     | %      | Other   | Healt. Work. |
|--------------|--------|--------------|---------|--------|---------|--------------|
| Asymptomatic | 126481 | 41706        | 168187  | 85.39% | 82.16%  | 96.95%       |
| Symptomatic  | 27469  | 1314         | 28783   | 14.61% | 17.84%  | 3.05%        |
| tot          | 153950 | 43020        | 196970  |        | 100.00% | 100.00%      |
|              | 78.16% | 21.84%       | 100.00% |        |         |              |

**tab4.5 Only symptomatic records: Healthcare workers- and COVID-19 related symptoms**

|          | Others | Healt. Work. | tot     |        | Other   | Healt. Work. |
|----------|--------|--------------|---------|--------|---------|--------------|
| NEGATIVE | 21129  | 1032         | 22161   | 76.99% | 76.92%  | 78.54%       |
| POSITIVE | 6340   | 282          | 6622    | 23.01% | 23.08%  | 21.46%       |
| tot      | 27469  | 1314         | 28783   |        | 100.00% | 100.00%      |
|          | 95.43% | 4.57%        | 100.00% |        |         |              |

**tab4.6 Healthcare workers- and COVID-19 related symptoms by period**

|        |             | Asymptomatic |        | Symptomatic |  |
|--------|-------------|--------------|--------|-------------|--|
| I-FMAM | Healt. Work | 21303        | 913    | 22216       |  |
|        |             | 95.89%       | 4.11%  | 100%        |  |
|        | Others      | 34321        | 13849  | 48170       |  |
|        |             | 71.25%       | 28.75% | 100%        |  |
| II-GLA | Healt. Work | 4446         | 122    | 4568        |  |
|        |             | 97.33%       | 2.67%  | 100%        |  |
|        | Others      | 29360        | 4659   | 34019       |  |
|        |             | 86.30%       | 13.70% | 100%        |  |
| III-SO | Healt. Work | 13487        | 257    | 13744       |  |
|        |             | 98.13%       | 1.87%  | #####       |  |
|        | Others      | 39242        | 5493   | 44735       |  |
|        |             | 87.72%       | 12.28% | #####       |  |
| IV-ND  | Healt. Work | 2470         | 22     | 2492        |  |
|        |             | 99.12%       | 0.88%  | 100%        |  |
|        | Others      | 23558        | 3468   | 27026       |  |
|        |             | 87.17%       | 12.83% | 100%        |  |



## 5-Ass.homes guests-S symth. cat

**unigrams for assistance homes guests:** cas, casa, comunit, comunita, dimora, resident, residenz, residenzial, residenzialit, residenzialt dormitorioi, fissa, ospit, ospite, resid, riposo, rra, rsa, struttura,vagabondaggi

**tab5.1** Ass. Homes guest and test outcome

|          | Others | Guests | tot     | %      | % Others | % Guest |
|----------|--------|--------|---------|--------|----------|---------|
| NEGATIVE | 105460 | 22263  | 127723  | 82.96% | 82.89%   | 83.34%  |
| POSITIVE | 21775  | 4452   | 26227   | 17.04% | 17.11%   | 16.66%  |
| tot      | 127235 | 26715  | 153950  |        | 100.00%  | 100.00% |
|          | 82.65% | 17.35% | 100.00% |        |          |         |

**tab5.2** Ass. Homes guests and period

|            | Others | Guests | tot period | % Guest in period |
|------------|--------|--------|------------|-------------------|
| I-FMAM     | 36931  | 11239  | 48170      | 23.33%            |
| II-GLA     | 27831  | 6188   | 34019      | 18.19%            |
| III-SO     | 38668  | 6067   | 44735      | 13.56%            |
| IV-ND      | 23805  | 3221   | 27026      | 11.92%            |
| tot esito  | 127235 | 26715  | 153950     |                   |
| %tot esito | 82.65% | 17.35% |            |                   |

**tab5.3** Ass. Homes guests and test outcome by period

|        |        | NEGATIVE |        | POSITIVE |
|--------|--------|----------|--------|----------|
| I-FMAM | Guests | 8238     | 3001   | 11239    |
|        |        | 73.30%   | 26.70% | 100%     |
|        | Others | 28543    | 8388   | 36931    |
|        |        | 77.29%   | 22.71% | 100%     |
| II-JJA | Guests | 5873     | 315    | 6188     |
|        |        | 94.91%   | 5.09%  | 100%     |
|        | Others | 26911    | 920    | 27831    |
|        |        | 96.69%   | 3.31%  | 100%     |
| III-SO | Guests | 5757     | 310    | 6067     |
|        |        | 94.89%   | 5.11%  | 100.00%  |
|        | Others | 34076    | 4592   | 38668    |
|        |        | 88.12%   | 11.88% | 100.00%  |
| IV-ND  | Guests | 2395     | 826    | 3221     |
|        |        | 74.36%   | 25.64% | 100%     |
|        | Others | 15930    | 7875   | 23805    |
|        |        | 66.92%   | 33.08% | 100%     |

**tab5.4** Ass. Homes guests and COVID-19 related symptoms

|              | Others | Guests | tot     | %      | Others  | Guests  |
|--------------|--------|--------|---------|--------|---------|---------|
| Asymptomatic | 100751 | 25730  | 126481  | 82.16% | 79.18%  | 96.31%  |
| Symptomatic  | 26484  | 985    | 27469   | 17.84% | 20.82%  | 3.69%   |
| tot          | 127235 | 26715  | 153950  |        | 100.00% | 100.00% |
|              | 82.65% | 17.35% | 100.00% |        |         |         |

**tab5.5** Only symptomatic records: Ass. Homes guests- and COVID-19 related symptoms

|          | Others | Guests | tot     |        | 0       | 1       |
|----------|--------|--------|---------|--------|---------|---------|
| NEGATIVE | 20540  | 589    | 21129   | 76.92% | 77.56%  | 59.80%  |
| POSITIVE | 5944   | 396    | 6340    | 23.08% | 22.44%  | 40.20%  |
| Sum      | 26484  | 985    | 27469   |        | 100.00% | 100.00% |
|          | 96.41% | 3.59%  | 100.00% |        |         |         |

**tab5.6** Ass. Homes guests and COVID-19 related symptoms by period

|        |        | Asymptomatic | Simptomatic |         |
|--------|--------|--------------|-------------|---------|
| I-FMAM | Guests | 10487        | 752         | 11239   |
|        |        | 93.31%       | 6.69%       | 100%    |
|        | Others | 23834        | 13097       | 36931   |
|        |        | 64.54%       | 35.46%      | 100%    |
| II-JJA | Guests | 6085         | 103         | 6188    |
|        |        | 98.34%       | 1.66%       | 100%    |
|        | Others | 23275        | 4556        | 27831   |
|        |        | 83.63%       | 16.37%      | 100%    |
| III-SO | Guests | 5950         | 117         | 6067    |
|        |        | 98.07%       | 1.93%       | 100.00% |
|        | Others | 33292        | 5376        | 38668   |
|        |        | 86.10%       | 13.90%      | 100.00% |
| IV-ND  | Guests | 3208         | 13          | 3221    |
|        |        | 99.60%       | 0.40%       | 100%    |
|        | Others | 20350        | 3455        | 23805   |
|        |        | 85.49%       | 14.51%      | 100%    |

## 6-positive contacts subj-S symt

unigrams for positive contacts subject: contatoi, contattio, contatto, positi, positiv, positivit, positivo

**tab6.1** Contacts with positive and test outcome

|          | Others | Cont. Pos. | tot     | %      | Others  | Cont. Pos. |
|----------|--------|------------|---------|--------|---------|------------|
| NEGATIVE | 102102 | 25621      | 127723  | 82.96% | 84.84%  | 76.25%     |
| POSITIVE | 18245  | 7982       | 26227   | 17.04% | 15.16%  | 23.75%     |
| tot      | 120347 | 33603      | 153950  |        | 100.00% | 100.00%    |
|          | 78.17% | 21.83%     | 100.00% |        |         |            |

**tab6.2** Contacts with positive and period

|            | Others | Cont. Pos. | tot period | % Cont. Pos. In period |
|------------|--------|------------|------------|------------------------|
| I-FMAM     | 35963  | 12207      | 48170      | 25.34%                 |
| II-JJA     | 31494  | 2525       | 34019      | 7.42%                  |
| III-SO     | 37186  | 7549       | 44735      | 16.87%                 |
| IV-ND      | 15704  | 11322      | 27026      | 41.89%                 |
| tot esito  | 127235 | 26715      | 153950     |                        |
| %tot esito | 82.65% | 17.35%     |            |                        |

**tab6.3** Contacts with positive and test outcome by period

|        |            | NEGATIVO | POSITIVO |         |
|--------|------------|----------|----------|---------|
| I-FMAM | Cont. Pos. | 8960     | 3247     | 12207   |
|        |            | 73.40%   | 26.60%   | 100%    |
|        | Others     | 27821    | 8142     | 35963   |
|        |            | 77.36%   | 22.64%   | 100%    |
| II-JJA | Cont. Pos. | 2394     | 131      | 2525    |
|        |            | 94.81%   | 5.19%    | 100%    |
|        | Others     | 30390    | 1104     | 31494   |
|        |            | 96.49%   | 3.51%    | 100%    |
| III-SO | Cont. Pos. | 6436     | 1113     | 7549    |
|        |            | 85.26%   | 14.74%   | 100.00% |
|        | Others     | 33397    | 3789     | 37186   |
|        |            | 89.81%   | 10.19%   | 100.00% |
| IV-ND  | Cont. Pos. | 7831     | 3491     | 11322   |
|        |            | 69.17%   | 30.83%   | 100%    |
|        | Others     | 10494    | 5210     | 15704   |
|        |            | 66.82%   | 33.18%   | 100%    |

**tab6.4** Contacts with positive and COVID-19 related symptoms

|              | Others | Cont. Pos. | tot     | %      | Others  | Cont. Pos. |
|--------------|--------|------------|---------|--------|---------|------------|
| Asymptomatic | 99006  | 27475      | 126481  | 82.16% | 82.27%  | 81.76%     |
| Symptomatic  | 21341  | 6128       | 27469   | 17.84% | 17.73%  | 18.24%     |
| tot          | 120347 | 33603      | 153950  |        | 100.00% | 100.00%    |
|              | 78.17% | 21.83%     | 100.00% |        |         |            |

**tab6.5** Only symptomatic records: Contacts with positive and COVID-19 related symptoms

|          | Others | Cont. Pos. | tot     | %      | Others  | Cont. Pos. |
|----------|--------|------------|---------|--------|---------|------------|
| NEGATIVE | 16796  | 4333       | 21129   | 76.92% | 78.70%  | 70.71%     |
| POSITIVE | 4545   | 1795       | 6340    | 23.08% | 21.30%  | 29.29%     |
| tot      | 21341  | 6128       | 27469   |        | 100.00% | 100.00%    |
|          | 77.69% | 22.31%     | 100.00% |        |         |            |

**tab6.6** Contacts with positive and COVID-19 related symptoms by period

|        |            | Asymptomatic | Symptomatic |         |
|--------|------------|--------------|-------------|---------|
| I-FMAM | Cont. Pos. | 8958         | 3249        | 12207   |
|        |            | 73.38%       | 26.62%      | 100%    |
|        | Others     | 25363        | 10600       | 35963   |
|        |            | 70.53%       | 29.47%      | 100%    |
| II-JJA | Cont. Pos. | 2441         | 84          | 2525    |
|        |            | 96.67%       | 3.33%       | 100%    |
|        | Others     | 26919        | 4575        | 31494   |
|        |            | 85.47%       | 14.53%      | 100%    |
| III-SO | Cont. Pos. | 7124         | 425         | 7549    |
|        |            | 94.37%       | 5.63%       | 100.00% |
|        | Others     | 32118        | 5068        | 37186   |
|        |            | 86.37%       | 13.63%      | 100.00% |
| IV-ND  | Cont. Pos. | 8952         | 2370        | 11322   |
|        |            | 79.07%       | 20.93%      | 100%    |
|        | Others     | 14606        | 1098        | 15704   |
|        |            | 93.01%       | 6.99%       | 100%    |

## 7-COVID-19 and Pathologies symphoms

**tab7.1** COVID-19 related symptoms and test outcome

|          | Asymptomatic | Simptomatic | tot     | %      | Asymptomatic | Simptomatic |
|----------|--------------|-------------|---------|--------|--------------|-------------|
| NEGATIV  | 145838       | 22161       | 167999  | 85.29% | 86.71%       | 76.99%      |
| POSITIVE | 22349        | 6622        | 28971   | 14.71% | 13.29%       | 23.01%      |
| tot      | 168187       | 28783       | 196970  |        | 100.00%      | 100.00%     |
|          | 85.39%       | 14.61%      | 100.00% |        |              |             |

**tab7.2** Others Pathologies related symtoms and test outcome

|          | No Pathologies | Pathologies | tot     | %      | No Pathologies | Pathologies |
|----------|----------------|-------------|---------|--------|----------------|-------------|
| NEGATIV  | 156948         | 11051       | 167999  | 85.29% | 84.93%         | 90.74%      |
| POSITIVE | 27843          | 1128        | 28971   | 14.71% | 15.07%         | 9.26%       |
| tot      | 184791         | 12179       | 196970  |        | 100.00%        | 100.00%     |
|          | 93.82%         | 6.18%       | 100.00% |        |                |             |

**tab7.3** COVID-19 related symptoms and test outcome by period

|        |              | NEGATIVE | POSITIVE |         |
|--------|--------------|----------|----------|---------|
| I-FMAM | Symptomatic  | 10287    | 4475     | 14762   |
|        |              | 69.69%   | 30.31%   | 100%    |
|        | Asymptomatic | 46771    | 8853     | 55624   |
|        |              | 84.08%   | 15.92%   | 100%    |
| II-JJA | Symptomatic  | 4726     | 55       | 4781    |
|        |              | 98.85%   | 1.15%    | 100%    |
|        | Asymptomatic | 32571    | 1235     | 33806   |
|        |              | 96.35%   | 3.65%    | 100%    |
| III-SO | Symptomatic  | 4546     | 1204     | 5750    |
|        |              | 79.06%   | 20.94%   | 100.00% |
|        | Asymptomatic | 48613    | 4116     | 52729   |
|        |              | 92.19%   | 7.81%    | 100.00% |
| IV-ND  | Symptomatic  | 2602     | 888      | 3490    |
|        |              | 74.56%   | 25.44%   | 100%    |
|        | Asymptomatic | 17883    | 8145     | 26028   |
|        |              | 68.71%   | 31.29%   | 100%    |

tab7.4

COVID-19 related symptoms and test outcome by sex

|          | MALE         |        |             |        |        |        | FEMALE       |        |             |        |        |        | ALL          |        |             |        |        |        |
|----------|--------------|--------|-------------|--------|--------|--------|--------------|--------|-------------|--------|--------|--------|--------------|--------|-------------|--------|--------|--------|
|          | Asymptomatic |        | Simptomatic |        | tot    |        | Asymptomatic |        | Simptomatic |        | tot    |        | Asymptomatic |        | Simptomatic |        | tot    |        |
|          |              | %      |             | %      |        | %      |              | %      |             | %      |        | %      |              | %      |             | %      |        | %      |
| NEGATIVE | 57400        | 85.6%  | 10451       | 74.8%  | 67851  | 83.8%  | 88438        | 87.4%  | 11710       | 79.1%  | 100148 | 86.4%  | 145838       | 86.7%  | 22161       | 77.0%  | 167999 | 85.3%  |
| POSITIVE | 9620         | 14.4%  | 3527        | 25.2%  | 13147  | 16.2%  | 12729        | 12.6%  | 3095        | 20.9%  | 15824  | 13.6%  | 22349        | 13.3%  | 6622        | 23.0%  | 28971  | 14.7%  |
| tot      | 67020        | 100.0% | 13978       | 100.0% | 80998  | 100.0% | 101167       | 100.0% | 14805       | 100.0% | 115972 | 100.0% | 168187       | 100.0% | 28783       | 100.0% | 196970 | 100.0% |
| %        | 82.7%        |        | 17.3%       |        | 100.0% |        | 87.2%        |        | 12.8%       |        | 100.0% |        | 85.4%        |        | 14.6%       |        | 100.0% |        |



tab7.5 Only Sympomatic Records: Age by outcome and sex

| Age      | all      |      |       |          |      |       |        |      |       | Male     |      |       |          |      |       |        |       |       | Female   |       |       |          |       |       |        |       |       |
|----------|----------|------|-------|----------|------|-------|--------|------|-------|----------|------|-------|----------|------|-------|--------|-------|-------|----------|-------|-------|----------|-------|-------|--------|-------|-------|
|          | Negative |      |       | Positive |      |       | tot    |      |       | Negative |      |       | Positive |      |       | tot    |       |       | Negative |       |       | Positive |       |       | tot    |       |       |
|          | #        | %    | cum%  | #        | %    | cum%  | #      | %    | cum%  | #        | %    | cum%  | #        | %    | cum%  | #      | %     | cum%  | #        | %     | cum%  | #        | %     | cum%  | #      | %     | cum%  |
| (0,5]    | 853      | 3.8  | 3.8   | 37       | 0.6  | 0.6   | 890    | 3.1  | 3.1   | 455      | 4.4  | 4.4   | 20       | 0.6  | 0.6   | 475    | 3.4   | 3.4   | 398      | 3.4   | 3.4   | 17       | 0.5   | 0.5   | 415    | 2.8   | 2.8   |
| (5,10]   | 443      | 2.0  | 5.8   | 42       | 0.6  | 1.2   | 485    | 1.7  | 4.8   | 216      | 2.1  | 6.4   | 26       | 0.7  | 1.3   | 242    | 1.7   | 5.1   | 227      | 1.9   | 5.3   | 16       | 0.5   | 1.1   | 243    | 1.6   | 4.4   |
| (10,13]  | 257      | 1.2  | 7.0   | 43       | 0.6  | 1.8   | 300    | 1.0  | 5.8   | 134      | 1.3  | 7.7   | 19       | 0.5  | 1.8   | 153    | 1.1   | 6.2   | 123      | 1.1   | 6.4   | 24       | 0.8   | 1.8   | 147    | 1.0   | 5.4   |
| (13,18]  | 563      | 2.5  | 9.5   | 103      | 1.6  | 3.4   | 666    | 2.3  | 8.1   | 319      | 3.1  | 10.8  | 56       | 1.6  | 3.4   | 375    | 2.7   | 8.9   | 244      | 2.1   | 8.5   | 47       | 1.5   | 3.4   | 291    | 2.0   | 7.4   |
| (18,25]  | 1169     | 5.3  | 14.8  | 249      | 3.8  | 7.2   | 1418   | 4.9  | 13.1  | 549      | 5.3  | 16.0  | 130      | 3.7  | 7.1   | 679    | 4.9   | 13.8  | 620      | 5.3   | 13.8  | 119      | 3.8   | 7.2   | 739    | 5.0   | 12.4  |
| (25,35]  | 2291     | 10.3 | 25.2  | 561      | 8.5  | 15.6  | 2852   | 9.9  | 23.0  | 981      | 9.4  | 25.4  | 293      | 8.3  | 15.4  | 1274   | 9.1   | 22.9  | 1310     | 11.2  | 25.0  | 268      | 8.7   | 15.9  | 1578   | 10.7  | 23.1  |
| (35,45]  | 2562     | 11.6 | 36.7  | 620      | 9.4  | 25.0  | 3182   | 11.1 | 34.0  | 1129     | 10.8 | 36.2  | 288      | 8.2  | 23.6  | 1417   | 10.1  | 33.0  | 1433     | 12.2  | 37.2  | 332      | 10.7  | 26.6  | 1765   | 11.9  | 35.0  |
| (45,55]  | 3139     | 14.2 | 50.9  | 1158     | 17.5 | 42.5  | 4297   | 14.9 | 49.0  | 1426     | 13.6 | 49.8  | 610      | 17.3 | 40.9  | 2036   | 14.6  | 47.6  | 1713     | 14.6  | 51.8  | 548      | 17.7  | 44.3  | 2261   | 15.3  | 50.2  |
| (55,65]  | 2840     | 12.8 | 63.7  | 1094     | 16.5 | 59.0  | 3934   | 13.7 | 62.6  | 1361     | 13.0 | 62.9  | 614      | 17.4 | 58.3  | 1975   | 14.1  | 61.7  | 1479     | 12.6  | 64.4  | 480      | 15.5  | 59.8  | 1959   | 13.2  | 63.5  |
| (65,75]  | 2692     | 12.1 | 75.8  | 967      | 14.6 | 73.6  | 3659   | 12.7 | 75.3  | 1425     | 13.6 | 76.5  | 592      | 16.8 | 75.1  | 2017   | 14.4  | 76.1  | 1267     | 10.8  | 75.3  | 375      | 12.1  | 71.9  | 1642   | 11.1  | 74.6  |
| (75,85]  | 3387     | 15.3 | 91.1  | 1120     | 16.9 | 90.5  | 4507   | 15.7 | 91.0  | 1674     | 16.0 | 92.5  | 614      | 17.4 | 92.5  | 2288   | 16.4  | 92.5  | 1713     | 14.6  | 89.9  | 506      | 16.3  | 88.3  | 2219   | 15.0  | 89.6  |
| (85,95]  | 1847     | 8.3  | 99.5  | 593      | 9.0  | 99.5  | 2440   | 8.5  | 99.5  | 747      | 7.1  | 99.7  | 252      | 7.1  | 99.6  | 999    | 7.1   | 99.7  | 1100     | 9.4   | 99.3  | 341      | 11.0  | 99.3  | 1441   | 9.7   | 99.3  |
| (95,110] | 118      | 0.5  | 100.0 | 35       | 0.5  | 100.0 | 153    | 0.5  | 100.0 | 35       | 0.3  | 100.0 | 13       | 0.4  | 100.0 | 48     | 0.3   | 100.0 | 83       | 0.7   | 100.0 | 22       | 0.7   | 100.0 | 105    | 0.7   | 100.0 |
| tot      | 22161    | 100  |       | 6622     | 100  |       | 28783  | 100  |       | 10451    | 100  |       | 3527     | 100  |       | 13978  | 100.0 |       | 11710    | 100.0 |       | 3095     | 100.0 |       | 14805  | 100.0 |       |
| %        | 76.99%   |      |       | 23.01%   |      |       | 100.0% |      |       | 74.77%   |      |       | 25.23%   |      |       | 100.0% |       |       | 79.09%   |       |       | 20.91%   |       |       | 100.0% |       |       |

tab7.6 Only Asympomatic Records: Age by outcome and sex

| Age      | all      |      |       |          |      |       |        |      |       | Male     |      |       |          |      |       |        |       |       | Female   |       |       |          |       |       |        |       |       |
|----------|----------|------|-------|----------|------|-------|--------|------|-------|----------|------|-------|----------|------|-------|--------|-------|-------|----------|-------|-------|----------|-------|-------|--------|-------|-------|
|          | Negative |      |       | Positive |      |       | tot    |      |       | Negative |      |       | Positive |      |       | tot    |       |       | Negative |       |       | Positive |       |       | tot    |       |       |
|          | #        | %    | cum%  | #        | %    | cum%  | #      | %    | cum%  | #        | %    | cum%  | #        | %    | cum%  | #      | %     | cum%  | #        | %     | cum%  | #        | %     | cum%  | #      | %     | cum%  |
| (0,5]    | 1936     | 1.3  | 1.3   | 174      | 0.8  | 0.8   | 2110   | 1.3  | 1.3   | 1014     | 1.8  | 1.8   | 83       | 0.9  | 0.9   | 1097   | 1.6   | 1.6   | 922      | 1.0   | 1.0   | 91       | 0.7   | 0.7   | 1013   | 1.0   | 1.0   |
| (5,10]   | 2307     | 1.6  | 2.9   | 214      | 1.0  | 1.7   | 2521   | 1.5  | 2.8   | 1183     | 2.1  | 3.8   | 108      | 1.1  | 2.0   | 1291   | 9.2   | 10.9  | 1124     | 1.3   | 2.3   | 106      | 0.8   | 1.5   | 1230   | 1.2   | 2.2   |
| (10,13]  | 1883     | 1.3  | 4.2   | 274      | 1.2  | 3.0   | 2157   | 1.3  | 4.0   | 1037     | 1.8  | 5.6   | 134      | 1.4  | 3.4   | 1171   | 8.4   | 19.3  | 846      | 1.0   | 3.3   | 140      | 1.1   | 2.6   | 986    | 1.0   | 3.2   |
| (13,18]  | 3547     | 2.4  | 6.6   | 579      | 2.6  | 5.6   | 4126   | 2.5  | 6.5   | 1945     | 3.4  | 9.0   | 314      | 3.3  | 6.6   | 2259   | 16.2  | 35.4  | 1602     | 1.8   | 5.1   | 265      | 2.1   | 4.7   | 1867   | 1.8   | 5.0   |
| (18,25]  | 8221     | 5.6  | 12.3  | 1422     | 6.4  | 11.9  | 9643   | 5.7  | 12.2  | 3750     | 6.5  | 15.6  | 698      | 7.3  | 13.9  | 4448   | 31.8  | 67.2  | 4471     | 5.1   | 10.1  | 724      | 5.7   | 10.4  | 5195   | 5.1   | 10.2  |
| (25,35]  | 20011    | 13.7 | 26.0  | 2692     | 12.0 | 24.0  | 22703  | 13.5 | 25.7  | 8425     | 14.7 | 30.2  | 1301     | 13.5 | 27.4  | 9726   | 69.6  | 136.8 | 11586    | 13.1  | 23.2  | 1391     | 10.9  | 21.3  | 12977  | 12.8  | 23.0  |
| (35,45]  | 20995    | 14.4 | 40.4  | 2643     | 11.8 | 35.8  | 23638  | 14.1 | 39.8  | 7779     | 13.6 | 43.8  | 1136     | 11.8 | 39.2  | 8915   | 63.8  | 200.6 | 13216    | 14.9  | 38.2  | 1507     | 11.8  | 33.2  | 14723  | 14.6  | 37.6  |
| (45,55]  | 29140    | 20.0 | 60.4  | 3861     | 17.3 | 53.1  | 33001  | 19.6 | 59.4  | 9658     | 16.8 | 60.6  | 1632     | 17.0 | 56.2  | 11290  | 80.8  | 281.4 | 19482    | 22.0  | 60.2  | 2229     | 17.5  | 50.7  | 21711  | 21.5  | 59.0  |
| (55,65]  | 21027    | 14.4 | 74.8  | 2893     | 12.9 | 66.0  | 23920  | 14.2 | 73.6  | 8314     | 14.5 | 75.1  | 1379     | 14.3 | 70.5  | 9693   | 69.3  | 350.7 | 12713    | 14.4  | 74.6  | 1514     | 11.9  | 62.6  | 14227  | 14.1  | 73.1  |
| (65,75]  | 10666    | 7.3  | 82.1  | 1935     | 8.7  | 74.7  | 12601  | 7.5  | 81.1  | 5665     | 9.9  | 85.0  | 1049     | 10.9 | 81.4  | 6714   | 48.0  | 398.7 | 5001     | 5.7   | 80.2  | 886      | 7.0   | 69.5  | 5887   | 5.8   | 78.9  |
| (75,85]  | 13869    | 9.5  | 91.6  | 2803     | 12.5 | 87.2  | 16672  | 9.9  | 91.0  | 5662     | 9.9  | 94.8  | 1173     | 12.2 | 93.6  | 6835   | 48.9  | 447.6 | 8207     | 9.3   | 89.5  | 1630     | 12.8  | 82.4  | 9837   | 9.7   | 88.6  |
| (85,95]  | 11009    | 7.5  | 99.2  | 2547     | 11.4 | 98.6  | 13556  | 8.1  | 99.1  | 2804     | 4.9  | 99.7  | 584      | 6.1  | 99.7  | 3388   | 24.2  | 471.9 | 8205     | 9.3   | 98.8  | 1963     | 15.4  | 97.8  | 10168  | 10.1  | 98.7  |
| (95,110] | 1227     | 0.8  | 100.0 | 312      | 1.4  | 100.0 | 1539   | 0.9  | 100.0 | 164      | 0.3  | 100.0 | 29       | 0.3  | 100.0 | 193    | 1.4   | 473.3 | 1063     | 1.2   | 100.0 | 283      | 2.2   | 100.0 | 1346   | 1.3   | 100.0 |
| tot      | 145838   | 100  |       | 22349    | 100  |       | 168187 | 100  |       | 57400    | 100  |       | 9620     | 100  |       | 67020  | 473.3 |       | 88438    | 100.0 |       | 12729    | 100.0 |       | 101167 | 100.0 |       |
| %        | 86.71%   |      |       | 13.29%   |      |       | 100.0% |      |       | 85.65%   |      |       | 14.35%   |      |       | 100.0% |       |       | 87.42%   |       |       | 12.58%   |       |       | 100.0% |       |       |
